# Supplementary material for: Quantitative high resolution melting: two methods to determine SNP allele frequencies from pooled samples
Source: PubMed Central journal article supplement (PMC4465018; doi:10.1186/s12863-015-0222-z), 2015-06-13

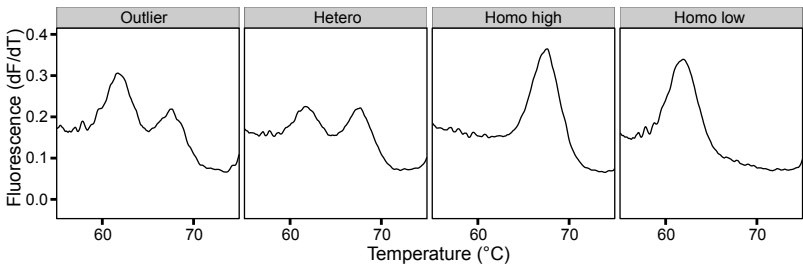

Supplement: 12863_2015_222_MOESM7_ESM.pdf [file 12863_2015_222_MOESM7_ESM.pdf]
